# Supplementary material for: Association of Maternal Diet with Infant Birthweight in Women with Gestational Diabetes Mellitus
Source: MDPI journal article supplement (doi:10.3390/nu15214545), 2023-10-26
Supplement: s1 [file s1]

## Ερωτηματολόγιο συχνότητας κατανάλωσης τροφίμων στην κύηση

|                |                                        |
|----------------|----------------------------------------|
| Ονοματεπώνυμο: | Ημερ. Γέννησης:    /    /              |
| ID:            | Τρίμηνο:    1       2       3       PP |

Παρακαλείσθε να σημειώσετε με τη μέγιστη δυνατή ακρίβεια σε 1 μόνο κουτάκι κάθε γραμμής, αυτό που ταιριάζει περισσότερο στις συνήθειές σας κατά τους τελευταίους μήνες, ως προς τις ενδεικτικές μερίδες που αναφέρονται

1 κ.σ = μέγεθος αντίχειρα

1 φλ. τσαγιού = 1 μεγάλη γροθιά

1 μερίδα κρέας = παλάμη του χεριού

| 1. Πόσες μερίδες από τις παρακάτω κατηγορίες τροφίμων καταναλώνετε κατά μέσο όρο; |                                                             |                                                                                                               | σημειώστε αυτό που ταιριάζει περισσότερο |                   |                      |                  |
|-----------------------------------------------------------------------------------|-------------------------------------------------------------|---------------------------------------------------------------------------------------------------------------|------------------------------------------|-------------------|----------------------|------------------|
| Επεξήγηση μερίδας                                                                 |                                                             |                                                                                                               | Ποτέ /<br>Σχεδόν ποτέ                    | Μερίδες<br>/ημέρα | Μερίδες<br>/εβδομάδα | Μερίδες<br>/μήνα |
| <b>Ψωμί</b>                                                                       | α) Λευκό                                                    | 1 φέτα (τοστ)                                                                                                 |                                          |                   |                      |                  |
|                                                                                   | β) Ολικής άλεσης                                            |                                                                                                               |                                          |                   |                      |                  |
| <b>Πίτες</b>                                                                      | α) Σπιτικές ή με φύλλο                                      | 1 τεμάχιο (6x6 εκ)                                                                                            |                                          |                   |                      |                  |
|                                                                                   | β) Σφολιάτα                                                 |                                                                                                               |                                          |                   |                      |                  |
| <b>Μακαρόνια</b>                                                                  | α) Λευκά                                                    | 1 κεσεδάκι γιαουρτιού                                                                                         |                                          |                   |                      |                  |
|                                                                                   | β) Ολικής άλεσης                                            |                                                                                                               |                                          |                   |                      |                  |
| <b>Κριθαράκι</b>                                                                  |                                                             | 1 κεσεδάκι γιαουρτιού                                                                                         |                                          |                   |                      |                  |
| <b>Πατάτες</b>                                                                    |                                                             | 1 κεσεδάκι γιαουρτιού                                                                                         |                                          |                   |                      |                  |
| <b>Ρύζι</b>                                                                       |                                                             | 0,5 κεσεδάκι γιαουρτιού                                                                                       |                                          |                   |                      |                  |
| <b>Λαδερά</b> (π.χ. φασολάκια, αρακά, μπιριάμ)                                    |                                                             | 1,5 κεσεδάκι γιαουρτιού                                                                                       |                                          |                   |                      |                  |
| <b>Όσπρια</b> (π.χ. φακές, ρεβίθια - όχι φασολάκια, αρακά)                        |                                                             | 1 κεσεδάκι γιαουρτιού                                                                                         |                                          |                   |                      |                  |
| <b>Αυγά</b>                                                                       |                                                             | 1 τεμάχιο                                                                                                     |                                          |                   |                      |                  |
| <b>Κόκκινο κρέας</b> (π.χ. μοσχάρι, χοιρινό, αρνί, κατσίκι)                       |                                                             | μέγεθος παλάμης                                                                                               |                                          |                   |                      |                  |
| <b>Λευκό κρέας</b> (π.χ. κοτόπουλο, γαλοπούλα, κουνέλι)                           |                                                             | μέγεθος παλάμης                                                                                               |                                          |                   |                      |                  |
| <b>Αλλαντικά</b> (π.χ. γαλοπούλα, ζαμπόν, παριζάκι .κ.α.)                         |                                                             | 1 φέτα                                                                                                        |                                          |                   |                      |                  |
| <b>Ψάρια &amp; Θαλασσινά</b>                                                      |                                                             | μικρά ψάρια (4-5 τεμάχια), μεγάλα ψάρια (1 τεμάχιο), θαλασσινά 0,5 πιάτο                                      |                                          |                   |                      |                  |
| <b>Φρέσκες σαλάτες</b>                                                            |                                                             | 1 κεσεδάκι γιαουρτιού                                                                                         |                                          |                   |                      |                  |
| <b>Βραστάς σαλάτες</b>                                                            |                                                             | 0,5 κεσεδάκι γιαουρτιού                                                                                       |                                          |                   |                      |                  |
| <b>Φρούτα</b>                                                                     | α) φρέσκα                                                   | 1 μέτριο ή 2 μικρά φρούτα                                                                                     |                                          |                   |                      |                  |
|                                                                                   | β) αποξηραμένα                                              | 3 τεμάχια για μεγάλα, π.χ. δαμάσκηνα ή 1,5 κουταλιά σούπας για μικρά (σταφίδες, κράνμπερις)                   |                                          |                   |                      |                  |
| <b>Γαλακτομικά προϊόντα</b>                                                       |                                                             |                                                                                                               |                                          |                   |                      |                  |
|                                                                                   | α) Πλήρη                                                    | γάλα (250 ml) ή 2 φέτες τυρί (40 γρ) ή τυρί κρέμα (120 γρ) ή τυρί φέτα (80 γρ) ή 1 κεσεδάκι γιαούρτι (200 γρ) |                                          |                   |                      |                  |
|                                                                                   | β) Ημιαποβουτυρωμένα                                        |                                                                                                               |                                          |                   |                      |                  |
|                                                                                   | γ) Γάλα φυτικής προέλευσης (π.χ. αμυγδάλου, βρώμης, σόγιας) |                                                                                                               |                                          |                   |                      |                  |
| <b>Δημητριακά</b> (π.χ. κορν φλέικς, ή παρόμοια συσκευασμένα)                     |                                                             | 3 κ. σούπας                                                                                                   |                                          |                   |                      |                  |
| <b>Γλυκά</b>                                                                      | α) <u>ΜΕ Ζάχαρη</u>                                         | μπισκότο 1τμχ, σοκολάτα 1 μικρο τμχ, παγωτό 1 μικρή μπαλα, παστακι 1 τμχ                                      |                                          |                   |                      |                  |
|                                                                                   | β) <u>ΜΕ Άλλα</u> γλυκαντικά (π.χ. στέβια)                  |                                                                                                               |                                          |                   |                      |                  |

|                                                                              |                                                     |                                          |                |                   |               |
|------------------------------------------------------------------------------|-----------------------------------------------------|------------------------------------------|----------------|-------------------|---------------|
| Αλμυρά σνακ (π.χ. γαριδάκια, πατατάκια, ποπ-κορν)                            | Απαντήστε πόσες φορές                               |                                          |                |                   |               |
| "Γρήγορο φαγητό" (π.χ. πίτσα, γύρος, κρέπα)                                  | Απαντήστε πόσες φορές                               |                                          |                |                   |               |
| Ξηροί καρποί                                                                 | 1 χούφτα ξηρών καρπών , 1,5 κ σούπας βούτυρο καρπών |                                          |                |                   |               |
| 2. Πόσα ποτήρια ή φλυτζάνια από τα παρακάτω ποτά καταναλώνετε κατά μέσο όρο; |                                                     | σημειώστε αυτό που ταιριάζει περισσότερο |                |                   |               |
|                                                                              | Επεξήγηση μερίδας                                   | Ποτέ / Σχεδόν ποτέ                       | Μερίδες /ημέρα | Μερίδες /εβδομάδα | Μερίδες /μήνα |
| Νερό                                                                         | 1 κούπα (250 ml)                                    |                                          |                |                   |               |
| Καφές α) Με καφεΐνη                                                          | 0,5 κούπα (125 ml)                                  |                                          |                |                   |               |
| β) Χωρίς καφεΐνη                                                             |                                                     |                                          |                |                   |               |
| Τσάι                                                                         | 0,5 κούπα (125 ml)                                  |                                          |                |                   |               |
| Χαμομήλι ή άλλα αφεψήματα                                                    | 0,5 κούπα (125 ml)                                  |                                          |                |                   |               |
| ΣΥΝΟΛΙΚΑ κουτ. γλυκού ζάχαρης/μελιού στο ρόφημα την ημέρα;                   |                                                     | Απαντήστε με έναν αριθμό: _____          |                |                   |               |

|                                     |                                                                                                                 |                    |                |                   |               |
|-------------------------------------|-----------------------------------------------------------------------------------------------------------------|--------------------|----------------|-------------------|---------------|
|                                     |                                                                                                                 | Ποτέ / Σχεδόν ποτέ | Μερίδες /ημέρα | Μερίδες /εβδομάδα | Μερίδες /μήνα |
| Χυμός φρέσκος α) Φρεσκοστυμμένος    | 0,5 κούπα (125 ml)                                                                                              |                    |                |                   |               |
| β) Συσκευασμένος                    | 0,5 κούπα (125 ml)                                                                                              |                    |                |                   |               |
| Αναψυκτικά α) πλήρη σε θερμίδες     | 1 τενεκεδένιος περιέκτης (330 ml)                                                                               |                    |                |                   |               |
| β) χαμηλά σε θερμίδες (τύπου Light) |                                                                                                                 |                    |                |                   |               |
| Αλκοόλ                              | 1 ποτήρι κρασιού (150 ml), 1 τενεκεδένιος περιέκτης (330 ml) μπύρας, 1 σφηνάκι βότκα, τζιν ουίσκι, ούζο (30 ml) |                    |                |                   |               |

|                                                 |                                                                   |                                          |  |  |  |
|-------------------------------------------------|-------------------------------------------------------------------|------------------------------------------|--|--|--|
| 3. Πώς επιλέγετε να μαγειρεύετε τα γευματά σας; |                                                                   | σημειώστε αυτό που ταιριάζει περισσότερο |  |  |  |
|                                                 |                                                                   | Φορές /εβδομάδα                          |  |  |  |
| Τηγανητά                                        | πόσες φορές την εβδομάδα ετοιμάζετε κάτι με τον αντίστοιχο τρόπο; |                                          |  |  |  |
| Ψητά στον φούρνο/στη σχάρα                      |                                                                   |                                          |  |  |  |
| Βραστά                                          |                                                                   |                                          |  |  |  |

|                                                                                    |                   |                                          |                |                   |               |
|------------------------------------------------------------------------------------|-------------------|------------------------------------------|----------------|-------------------|---------------|
| 4.Τι ποσότητα από τα παρακάτω είδη προστιθέμενων λιπών καταναλώνετε κατα μέσο όρο; |                   | σημειώστε αυτό που ταιριάζει περισσότερο |                |                   |               |
|                                                                                    | Επεξήγηση μερίδας | Ποτέ / Σχεδόν ποτέ                       | Μερίδες /ημέρα | Μερίδες /εβδομάδα | Μερίδες /μήνα |
| Ελαιόλαδο                                                                          | 1 κουτ. σούπας    |                                          |                |                   |               |
| Φυτικά έλαια (καλαμποκέλαιο)                                                       | 1 κουτ. σούπας    |                                          |                |                   |               |
| Βούτυρο                                                                            | 1 κουτ. γλυκού    |                                          |                |                   |               |
| Μαργαρίνη                                                                          | 1 κουτ. γλυκού    |                                          |                |                   |               |
| Ελιές                                                                              | 5 τεμάχια         |                                          |                |                   |               |
| Κρέμα γάλακτος α) Χαμηλή σε λιπαρά                                                 | 1 κουτ. γλυκού    |                                          |                |                   |               |
| β) Κανονική                                                                        |                   |                                          |                |                   |               |

|                                                                                                |  |                          |
|------------------------------------------------------------------------------------------------|--|--------------------------|
|                                                                                                |  | Απαντήστε με έναν αριθμό |
| 5. Πόσα γεύματα <u>συνολικά</u> καταναλώνετε την ημέρα (κύρια γεύματα & σνακ);                 |  |                          |
| 6. Πόσες ημέρες την εβδομάδα <u>συνήθως</u> κάνετε μεσημεριανό ύπνο <u>μετά</u> το φαγητό σας; |  |                          |

Σας ενημερώνουμε πως **KANENA** στοιχείο που σας αφορά (προσωπικά στοιχεία, στοιχεία εγκυμοσύνης, συνήθειες διατροφής ή ό,τι άλλο) **ΔΕΝ** θα κοινοποιηθεί σε τρίτους **ΟΥΤΕ** θα χρησιμοποιηθεί για άλλο σκοπό, πέραν της ολοκλήρωσης της παρούσας μελέτης.
